# Supplementary material for: ET-WB: water-balance-based estimations of terrestrial evaporation over global land and major global basins
Source: Copernicus journal article supplement (doi:10.5194/essd-15-4571-2023), 2023-10-17
Supplement: Supplementary file 1 [file essd-15-4571-2023-supplement.pdf]

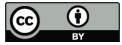

*Supplement of*

## **ET-WB: water-balance-based estimations of terrestrial evaporation over global land and major global basins**

**Jinghua Xiong et al.**

*Correspondence to:* Shenglian Guo ([slguo@whu.edu.cn](mailto:slguo@whu.edu.cn)) and Yun Pan ([pan@cnu.edu.cn](mailto:pan@cnu.edu.cn))

The copyright of individual parts of the supplement might differ from the article licence.

Table S1. List of 14 existing water transfer megaprojects from Shumilova et al. (2018). Please refer to Shumilova et al. (2018) for the whole of the global water diversion project database.

| Project name                                   | Start of project operation | Continent     | Country      | Donor                                                           | Recipient                                 | Transboundary status: international (I)/ national (N) | Total water transfer distance, km | Total water transfer volume, km <sup>3</sup> a <sup>-1</sup> | Estimated project cost, billion US\$ | Purposes of water transfer                 |
|------------------------------------------------|----------------------------|---------------|--------------|-----------------------------------------------------------------|-------------------------------------------|-------------------------------------------------------|-----------------------------------|--------------------------------------------------------------|--------------------------------------|--------------------------------------------|
| Eastern National Water Carrier                 | 1987                       | Africa        | Namibia      | Okavango River, Van Bach Dam                                    | Grootfontein                              | N                                                     | 394                               | 0.063                                                        | 0.15                                 | Domestic supply                            |
| Orange river Transfer Scheme                   | 1987                       | Africa        | South Africa | Orange River basin                                              | Great Fish and Sundays Rivers             | N                                                     | 97                                | 1.7                                                          | NA                                   | Flood control; hydropower; domestic supply |
| Indira Gandhi Canal                            | 1958                       | Asia          | India        | Harike Barrage at Harike (confluence of Satluj and Beas Rivers) | Thar Desert (Rajasthan state)             | N                                                     | 649                               | 10.608                                                       | NA                                   | Domestic supply; irrigation                |
| Telugu Ganga Project                           | 2004                       | Asia          | India        | Krishna River                                                   | Chennai city                              | N                                                     | 406                               | 0.1                                                          | NA                                   | Domestic supply                            |
| Snowy river Scheme                             | 1949                       | Australia     | Australia    | Murray-Darling River basin                                      | Snowy River                               | N                                                     | 100                               | 1.1                                                          | 0.63                                 | Irrigation, hydropower                     |
| Tagus-Segura Transfer                          | 1978                       | Europe        | Spain        | Upper Tagus River (Tagus Basin)                                 | Talave Dam (Mundo River, Segura basin)    | N                                                     | 286                               | 0.305                                                        | NA                                   | Irrigation; domestic supply                |
| California State Water Project                 | 1962                       | North America | USA          | Lake Oroville                                                   | South California (San Francisco bay area) | N                                                     | 1128                              | 3.33                                                         | 9                                    | Domestic supply; irrigation                |
| Cutzamala System                               | 1970                       | North America | Mexico       | Cutzamala River in the Balsas basin                             | Great Mexico City                         | N                                                     | 154                               | 0.479                                                        | 1.3                                  | Domestic supply                            |
| James Bay Project (La Grande Project, Phase 1) | 1984                       | North America | Canada       | Eastmain, Opinaca and Caniapiscou Rivers                        | reservoirs on La Grande River             | N                                                     | 400                               | 51.404                                                       | 13.7                                 | Hydropower                                 |
| Churchill River Diversion                      | 1977                       | North America | Canada       | Churchill River                                                 | Nelson River                              | N                                                     | 40                                | 24.44                                                        | NA                                   | Hydropower                                 |

|                             |      |               |        |                                            |                                         |   |     |        |    |                                     |
|-----------------------------|------|---------------|--------|--------------------------------------------|-----------------------------------------|---|-----|--------|----|-------------------------------------|
| Churchill Falls diversion   | 1970 | North America | Canada | Rivers Naskaupi and Kanairkto k            | Churchill River                         | N | 45  | 10.407 | NA | Hydropower                          |
| Long Lake Diversion         | 1941 | North America | Canada | Kenogami River                             | Lake Superior<br>(through Long Lake)    | N | 0.4 | 1.42   | NA | Hydropower, pulpwood transportation |
| Ogoki River Diversion       | 1943 | North America | Canada | Ogoki River                                | Lake Superior<br>(through Nipigon Lake) | N | 8.5 | 3.6    | NA | Hydropower, pulpwood transportation |
| Saint Joseph Lake Diversion | 1958 | North America | Canada | St-Joseph Lake<br>(source of Albany River) | Root River<br>(Nelson River)            | N | 7   | 2.7    | NA | Hydropower                          |

Table S2. Basic information of 168 selected river basins globally. The endorheic basins are colored yellow, of which Volga, Ural, and Kura basins that flow into the Caspian Sea are colored green.

| ID | Name        | Area (km <sup>2</sup> ) | Continent                                        | Ocean          | Sea               | AI   | Climate type | Irrigation rate (%) | Irrigation rate based on surface water (%) | Irrigation rate based on ground water (%) | Irrigation rate based on non-conventional water (%) |
|----|-------------|-------------------------|--------------------------------------------------|----------------|-------------------|------|--------------|---------------------|--------------------------------------------|-------------------------------------------|-----------------------------------------------------|
| 1  | Amazon      | 5,965,897               | South America                                    | Atlantic Ocean | North Atlantic    | 1.63 | Humid        | 0.13                | 0.10                                       | 0.03                                      | 0.00                                                |
| 2  | Congo       | 3,705,226               | Africa                                           | Atlantic Ocean | South Atlantic    | 1.01 | Humid        | 0.01                | 0.01                                       | 0.00                                      | 0.00                                                |
| 3  | Nile        | 3,353,206               | Africa                                           | Atlantic Ocean | Mediterranean Sea | 0.30 | Semiarid     | 1.52                | 1.47                                       | 0.06                                      | 0.00                                                |
| 4  | Mississippi | 3,240,619               | North America, Central America and the Caribbean | Atlantic Ocean | Gulf of Mexico    | 0.57 | Dry subhumid | 4.17                | 0.87                                       | 3.30                                      | 0.00                                                |
| 5  | Ob          | 3,040,606               | Asia                                             | Arctic Ocean   | Kara Sea          | 0.57 | Dry subhumid | 0.22                | 0.20                                       | 0.02                                      | 0.00                                                |
| 6  | Parana      | 2,647,020               | South America                                    | Atlantic Ocean | South Atlantic    | 0.73 | Humid        | 0.77                | 0.57                                       | 0.20                                      | 0.00                                                |

|    |           |           |                                                  |                |                    |      |              |      |      |      |      |
|----|-----------|-----------|--------------------------------------------------|----------------|--------------------|------|--------------|------|------|------|------|
| 7  | Yenisey   | 2,505,671 | Asia                                             | Arctic Ocean   | Kara Sea           | 0.68 | Humid        | 0.03 | 0.03 | 0.01 | 0.00 |
| 8  | Chad      | 2,471,047 | Africa                                           |                |                    | 0.15 | Arid         | 0.08 | 0.06 | 0.02 | 0.00 |
| 9  | Lena      | 2,453,648 | Asia                                             | Arctic Ocean   | Laptev Sea         | 0.62 | Dry subhumid | 0.00 | 0.00 | 0.00 | 0.00 |
| 10 | Amur      | 2,238,970 | Asia                                             | Pacific Ocean  | Sea of Okhotsk     | 0.58 | Dry subhumid | 1.89 | 0.77 | 1.12 | 0.00 |
| 11 | Niger     | 2,122,994 | Africa                                           | Atlantic Ocean | Gulf of Guinea     | 0.29 | Semi-arid    | 0.23 | 0.22 | 0.02 | 0.00 |
| 12 | Mackenzie | 1,795,636 | North America, Central America and the Caribbean | Arctic Ocean   | Beaufort Sea       | 0.59 | Dry subhumid | 0.00 | 0.00 | 0.00 | 0.00 |
| 13 | Yangtze   | 1,748,118 | Asia                                             | Pacific Ocean  | East China Sea     | 0.94 | Humid        | 8.08 | 7.70 | 0.39 | 0.00 |
| 14 | Tarim     | 1,563,202 | Asia                                             |                |                    | 0.08 | Arid         | 1.50 | 1.22 | 0.28 | 0.00 |
| 15 | Volga     | 1,424,438 | Europe                                           |                | Caspian Sea        | 0.70 | Humid        | 0.45 | 0.36 | 0.09 | 0.00 |
| 16 | Zambezi   | 1,378,099 | Africa                                           | Indian Ocean   | Mozambique Channel | 0.48 | Semi-arid    | 0.22 | 0.21 | 0.01 | 0.00 |
| 17 | Aral Sea  | 1,372,517 | Asia                                             |                |                    | 0.21 | Semi-arid    | 6.25 | 5.70 | 0.54 | 0.00 |
| 18 | Lake Eyre | 1,214,630 | South-West Pacific                               |                |                    | 0.09 | Arid         | 0.00 | 0.00 | 0.00 | 0.00 |
| 19 | Nelson    | 1,106,520 | North America, Central America and the Caribbean | Arctic Ocean   | Hudson-Bay         | 0.57 | Dry subhumid | 0.81 | 0.71 | 0.10 | 0.00 |
| 20 | Murray    | 1,055,419 | South-West Pacific                               | Indian Ocean   | Indian Ocean       | 0.26 | Semi-arid    | 2.33 | 1.89 | 0.41 | 0.03 |

|    |                |           |                                                  |                |                        |      |              |       |       |       |      |
|----|----------------|-----------|--------------------------------------------------|----------------|------------------------|------|--------------|-------|-------|-------|------|
| 21 | Saint Lawrence | 1,053,301 | North America, Central America and the Caribbean | Atlantic Ocean | Gulf of Saint Lawrence | 1.02 | Humid        | 0.49  | 0.17  | 0.32  | 0.00 |
| 22 | Ganges         | 1,006,559 | Asia                                             | Indian Ocean   | Bay of Bengal          | 0.62 | Dry subhumid | 29.33 | 8.80  | 20.53 | 0.00 |
| 23 | Orange         | 977,322   | Africa                                           | Atlantic Ocean | South Atlantic         | 0.16 | Arid         | 0.30  | 0.27  | 0.03  | 0.00 |
| 24 | Yellow         | 962,986   | Asia                                             | Pacific Ocean  | Yellow Sea             | 0.35 | Semi-arid    | 6.86  | 3.98  | 2.88  | 0.00 |
| 25 | Orinoco        | 941,417   | South America                                    | Atlantic Ocean | North Atlantic         | 1.43 | Humid        | 0.51  | 0.41  | 0.09  | 0.00 |
| 26 | Shatt Al Arab  | 935,570   | Asia                                             | Indian Ocean   | Persian Gulf           | 0.17 | Arid         | 7.63  | 6.03  | 1.58  | 0.01 |
| 27 | Indus          | 865,013   | Asia                                             | Indian Ocean   | Arabian Sea            | 0.29 | Semi-arid    | 17.67 | 10.28 | 7.39  | 0.00 |
| 28 | Yukon          | 832,821   | North America, Central America and the Caribbean | Pacific Ocean  | Bering Sea             | 0.57 | Dry subhumid | 0.00  | 0.00  | 0.00  | 0.00 |
| 29 | Jubba          | 797,881   | Africa                                           | Indian Ocean   | Indian Ocean           | 0.23 | Semi-arid    | 0.24  | 0.24  | 0.00  | 0.00 |
| 30 | Danube         | 795,316   | Europe                                           | Atlantic Ocean | Black Sea              | 0.81 | Humid        | 4.11  | 3.54  | 0.57  | 0.00 |
| 31 | Mekong         | 783,796   | Asia                                             | Pacific Ocean  | South China Sea        | 0.93 | Humid        | 4.33  | 4.26  | 0.08  | 0.00 |
| 32 | Tocantins      | 772,468   | South America                                    | Atlantic Ocean | South Atlantic         | 1.06 | Humid        | 0.27  | 0.23  | 0.04  | 0.00 |
| 33 | Okavango       | 692,223   | Africa                                           |                |                        | 0.23 | Semi-arid    | 0.00  | 0.00  | 0.00  | 0.00 |
| 34 | Rio Grande     | 673,858   | North America, Central America and the Caribbean | Atlantic Ocean | Gulf of Mexico         | 0.19 | Arid         | 2.24  | 1.02  | 1.22  | 0.00 |

|    |                 |         |                                                  |                |                    |      |              |      |      |      |      |
|----|-----------------|---------|--------------------------------------------------|----------------|--------------------|------|--------------|------|------|------|------|
|    |                 |         | an                                               |                |                    |      |              |      |      |      |      |
| 35 | Columbia        | 669,400 | North America, Central America and the Caribbean | Pacific Ocean  | North Pacific      | 0.58 | Dry subhumid | 4.56 | 3.28 | 1.28 | 0.00 |
| 36 | Colorado        | 661,114 | North America, Central America and the Caribbean | Pacific Ocean  | Gulf of California | 0.18 | Arid         | 2.31 | 1.68 | 0.63 | 0.00 |
| 37 | Kolyma          | 652,958 | Asia                                             | Arctic Ocean   | East Siberian Sea  | 0.54 | Dry subhumid | 0.00 | 0.00 | 0.00 | 0.00 |
| 38 | Sao Francisco   | 637,202 | South America                                    | Atlantic Ocean | South Atlantic     | 0.59 | Dry subhumid | 0.76 | 0.39 | 0.37 | 0.00 |
| 39 | Brahmaputra     | 540,783 | Asia                                             | Indian Ocean   | Bay of Bengal      | 0.90 | Humid        | 5.18 | 1.45 | 3.73 | 0.00 |
| 40 | Dnieper         | 509,817 | Europe                                           | Atlantic Ocean | Black Sea          | 0.69 | Humid        | 1.98 | 1.96 | 0.03 | 0.00 |
| 41 | Senegal         | 458,025 | Africa                                           | Atlantic Ocean | North Atlantic     | 0.20 | Arid         | 0.28 | 0.26 | 0.02 | 0.00 |
| 42 | Don             | 437,676 | Europe                                           | Atlantic Ocean | Black Sea          | 0.49 | Semi-arid    | 1.44 | 1.26 | 0.18 | 0.00 |
| 43 | Rio De La Plata | 427,307 | South America                                    | Atlantic Ocean | South Atlantic     | 0.59 | Dry subhumid | 0.32 | 0.20 | 0.12 | 0.00 |
| 44 | Irrawaddy       | 422,917 | Asia                                             | Indian Ocean   | Andaman Sea        | 1.22 | Humid        | 4.72 | 4.52 | 0.20 | 0.00 |
| 45 | Lake Balkhash   | 414,761 | Asia                                             |                |                    | 0.24 | Semi-arid    | 2.85 | 2.46 | 0.39 | 0.00 |
| 46 | Volta           | 412,645 | Africa                                           | Atlantic Ocean | Gulf of Guinea     | 0.48 | Semi-arid    | 0.11 | 0.09 | 0.02 | 0.00 |

|    |                 |         |                                                  |                |                    |      |              |       |      |       |      |
|----|-----------------|---------|--------------------------------------------------|----------------|--------------------|------|--------------|-------|------|-------|------|
| 47 | Limpopo         | 412,578 | Africa                                           | Indian Ocean   | Mozambique Channel | 0.28 | Semi-arid    | 1.08  | 0.99 | 0.08  | 0.00 |
| 48 | Pearl           | 411,930 | Asia                                             | Pacific Ocean  | South China Sea    | 1.16 | Humid        | 6.66  | 6.60 | 0.06  | 0.00 |
| 49 | Colorado        | 400,890 | South America                                    | Atlantic Ocean | South Atlantic     | 0.18 | Arid         | 1.23  | 0.99 | 0.24  | 0.00 |
| 50 | Indigirka       | 341,234 | Asia                                             | Arctic Ocean   | East Siberian Sea  | 0.53 | Dry subhumid | 0.00  | 0.00 | 0.00  | 0.00 |
| 51 | Parnaiba        | 332,979 | South America                                    | Atlantic Ocean | South Atlantic     | 0.62 | Dry subhumid | 0.18  | 0.08 | 0.11  | 0.00 |
| 52 | Pechora         | 314,221 | Europe                                           | Arctic Ocean   | Barents Sea        | 1.03 | Humid        | 0.00  | 0.00 | 0.00  | 0.00 |
| 53 | Godavari        | 310,375 | Asia                                             | Indian Ocean   | Bay of Bengal      | 0.52 | Dry subhumid | 11.62 | 3.84 | 7.78  | 0.00 |
| 54 | Severnaya Dvina | 306,849 | Europe                                           | Arctic Ocean   | White Sea          | 0.91 | Humid        | 0.01  | 0.01 | 0.00  | 0.00 |
| 55 | Churchill       | 302,494 | North America, Central America and the Caribbean | Arctic Ocean   | Hudson-Bay         | 0.66 | Humid        | 0.00  | 0.00 | 0.00  | 0.00 |
| 56 | Khatanga        | 300,828 | Asia                                             | Arctic Ocean   | Laptev Sea         | 0.80 | Humid        | 0.00  | 0.00 | 0.00  | 0.00 |
| 57 | Neva            | 281,465 | Europe                                           | Atlantic Ocean | Baltic Sea         | 0.96 | Humid        | 0.08  | 0.07 | 0.01  | 0.00 |
| 58 | Salween         | 266,293 | Asia                                             | Indian Ocean   | Andaman Sea        | 0.81 | Humid        | 1.08  | 1.06 | 0.02  | 0.00 |
| 59 | Uruguay         | 266,134 | South America                                    | Atlantic Ocean | South Atlantic     | 1.09 | Humid        | 2.13  | 1.79 | 0.34  | 0.00 |
| 60 | Magdalena       | 260,736 | South America                                    | Atlantic Ocean | Caribbean Sea      | 1.36 | Humid        | 1.90  | 1.80 | 0.09  | 0.00 |
| 61 | Krishna         | 258,785 | Asia                                             | Indian Ocean   | Bay of Bengal      | 0.44 | Semi-arid    | 17.57 | 7.41 | 10.16 | 0.00 |

|    |              |         |                                                  |                |                |      |              |       |       |       |      |
|----|--------------|---------|--------------------------------------------------|----------------|----------------|------|--------------|-------|-------|-------|------|
| 62 | Thelon       | 244,857 | North America, Central America and the Caribbean | Arctic Ocean   | Hudson Bay     | 0.61 | Dry subhumid | 0.00  | 0.00  | 0.00  | 0.00 |
| 63 | Yana         | 233,391 | Asia                                             | Arctic Ocean   | Laptev Sea     | 0.54 | Dry subhumid | 0.00  | 0.00  | 0.00  | 0.00 |
| 64 | Fraser       | 230,828 | North America, Central America and the Caribbean | Pacific Ocean  | North Pacific  | 0.88 | Humid        | 0.48  | 0.45  | 0.02  | 0.00 |
| 65 | Liao He      | 220,125 | Asia                                             | Pacific Ocean  | Yellow Sea     | 0.39 | Semi arid    | 12.84 | 5.67  | 7.17  | 0.00 |
| 66 | Olenek       | 217,723 | Asia                                             | Arctic Ocean   | Laptev Sea     | 0.56 | Dry subhumid | 0.00  | 0.00  | 0.00  | 0.00 |
| 67 | Haihe        | 215,966 | Asia                                             | Pacific Ocean  | East China Sea | 0.35 | Semi arid    | 24.57 | 5.90  | 18.67 | 0.00 |
| 68 | Ogooue       | 215,213 | Africa                                           | Atlantic Ocean | South Atlantic | 1.61 | Humid        | 0.02  | 0.02  | 0.00  | 0.00 |
| 69 | Ural         | 211,009 | Asia                                             |                | Caspian Sea    | 0.33 | Semi arid    | 0.43  | 0.40  | 0.03  | 0.00 |
| 70 | Vistula      | 192,638 | Europe                                           | Atlantic Ocean | Baltic Sea     | 0.73 | Humid        | 0.37  | 0.33  | 0.04  | 0.00 |
| 71 | Kura         | 189,819 | Europe                                           |                | Caspian Sea    | 0.46 | Semi arid    | 12.56 | 11.03 | 1.51  | 0.03 |
| 72 | Lake Turkana | 181,232 | Africa                                           |                |                | 0.47 | Semi arid    | 0.11  | 0.11  | 0.00  | 0.00 |
| 73 | Rufiji       | 177,135 | Africa                                           | Indian Ocean   | Indian Ocean   | 0.63 | Dry subhumid | 0.20  | 0.17  | 0.02  | 0.00 |
| 74 | Anadyr       | 172,111 | Asia                                             | Pacific Ocean  | Bering Sea     | 0.76 | Humid        | 0.00  | 0.00  | 0.00  | 0.00 |
| 75 | Huaihe       | 172,079 | Asia                                             | Pacific Ocean  | East China Sea | 0.65 | Humid        | 28.65 | 16.34 | 12.31 | 0.00 |
| 76 | Pyasina      | 169,628 | Asia                                             | Arctic Ocean   | Kara Sea       | 1.07 | Humid        | 0.00  | 0.00  | 0.00  | 0.00 |



|    |                 |         |                                                  |                |                  |      |           |       |       |      |      |
|----|-----------------|---------|--------------------------------------------------|----------------|------------------|------|-----------|-------|-------|------|------|
| 77 | Ruvuma          | 164,103 | Africa                                           | Indian Ocean   | Indian Ocean     | 0.67 | Humid     | 0.04  | 0.03  | 0.00 | 0.00 |
| 78 | Rhine           | 163,122 | Europe                                           | Atlantic Ocean | North Sea        | 1.13 | Humid     | 1.64  | 0.60  | 1.04 | 0.00 |
| 79 | Chao Phraya     | 157,707 | Asia                                             | Pacific Ocean  | Gulf of Thailand | 0.65 | Humid     | 18.92 | 16.56 | 2.36 | 0.00 |
| 80 | Chuy            | 152,951 | Asia                                             |                |                  | 0.17 | Arid      | 3.10  | 3.00  | 0.10 | 0.00 |
| 81 | Taz             | 150,291 | Asia                                             | Arctic Ocean   | Kara Sea         | 0.95 | Humid     | 0.00  | 0.00  | 0.00 | 0.00 |
| 82 | Cuanza          | 150,085 | Africa                                           | Atlantic Ocean | South Atlantic   | 0.71 | Humid     | 0.04  | 0.03  | 0.01 | 0.00 |
| 83 | Red             | 148,025 | Asia                                             | Pacific Ocean  | South China Sea  | 1.10 | Humid     | 6.53  | 6.47  | 0.06 | 0.00 |
| 84 | Fitzroy         | 140,912 | South-West Pacific                               | Pacific Ocean  | Coral Sea        | 0.31 | Semi-arid | 0.55  | 0.49  | 0.05 | 0.01 |
| 85 | Elbe            | 138,382 | Europe                                           | Atlantic Ocean | North Sea        | 0.77 | Humid     | 1.52  | 0.43  | 1.10 | 0.00 |
| 86 | Chubut          | 137,936 | South America                                    | Atlantic Ocean | South Atlantic   | 0.15 | Arid      | 0.23  | 0.22  | 0.01 | 0.00 |
| 87 | Great Salt Lake | 136,254 | North America, Central America and the Caribbean |                |                  | 0.19 | Arid      | 3.95  | 3.23  | 0.72 | 0.00 |
| 88 | Negro           | 136,085 | South America                                    | Atlantic Ocean | South Atlantic   | 0.27 | Semi-arid | 1.05  | 1.01  | 0.04 | 0.00 |
| 89 | Caniapiscau     | 135,537 | North America, Central America and the Caribbean | Arctic Ocean   | Hudson-Bay       | 1.41 | Humid     | 0.00  | 0.00  | 0.00 | 0.00 |
| 90 | Mahanadi        | 135,525 | Asia                                             | Indian Ocean   | Bay of Bengal    | 0.68 | Humid     | 9.72  | 8.11  | 1.61 | 0.00 |

|     |              |         |                                                  |                |                |      |           |      |      |      |      |
|-----|--------------|---------|--------------------------------------------------|----------------|----------------|------|-----------|------|------|------|------|
| 91  | Albany       | 134,726 | North America, Central America and the Caribbean | Arctic Ocean   | Hudson-Bay     | 1.03 | Humid     | 0.00 | 0.00 | 0.00 | 0.00 |
| 92  | Santiago     | 134,071 | North America, Central America and the Caribbean | Pacific Ocean  | North Pacific  | 0.39 | Semi-arid | 7.50 | 3.28 | 4.22 | 0.00 |
| 93  | Sanaga       | 133,627 | Africa                                           | Atlantic Ocean | Gulf of Guinea | 1.11 | Humid     | 0.01 | 0.01 | 0.00 | 0.00 |
| 94  | Burdekin     | 130,431 | South-West Pacific                               | Pacific Ocean  | Coral Sea      | 0.31 | Semi-arid | 0.37 | 0.21 | 0.16 | 0.01 |
| 95  | Mar Chiquita | 129,874 | South America                                    |                |                | 0.43 | Semi-arid | 1.65 | 1.48 | 0.17 | 0.00 |
| 96  | Usumacinta   | 127,388 | North America, Central America and the Caribbean | Atlantic Ocean | Gulf of Mexico | 1.27 | Humid     | 0.69 | 0.59 | 0.10 | 0.00 |
| 97  | Kuskokwim    | 123,081 | North America, Central America and the Caribbean | Pacific Ocean  | Bering Sea     | 0.85 | Humid     | 0.00 | 0.00 | 0.00 | 0.00 |
| 98  | Oder         | 118,791 | Europe                                           | Atlantic Ocean | Baltic Sea     | 0.68 | Humid     | 0.48 | 0.43 | 0.05 | 0.00 |
| 99  | Brazos       | 118,643 | North America, Central America and the Caribbean | Atlantic Ocean | Gulf of Mexico | 0.35 | Semi-arid | 8.01 | 0.26 | 7.76 | 0.00 |
| 100 | Loire        | 116,722 | Europe                                           | Atlantic Ocean | Bay of Biscay  | 0.76 | Humid     | 5.96 | 2.48 | 3.48 | 0.00 |

|     |               |         |                                                  |                |                     |      |           |      |      |      |      |
|-----|---------------|---------|--------------------------------------------------|----------------|---------------------|------|-----------|------|------|------|------|
| 101 | Lake Gairdner | 113,051 | South-West Pacific                               |                |                     | 0.09 | Arid      | 0.00 | 0.00 | 0.00 | 0.00 |
| 102 | Mobile        | 112,528 | North America, Central America and the Caribbean | Atlantic Ocean | Gulf of Mexico      | 0.99 | Humid     | 0.40 | 0.24 | 0.17 | 0.00 |
| 103 | Pur           | 111,253 | Asia                                             | Arctic Ocean   | Kara Sea            | 0.92 | Humid     | 0.00 | 0.00 | 0.00 | 0.00 |
| 104 | Colorado      | 110,769 | North America, Central America and the Caribbean | Atlantic Ocean | Gulf of Mexico      | 0.29 | Semi-arid | 4.35 | 0.29 | 4.06 | 0.00 |
| 105 | Kunene        | 108,947 | Africa                                           | Atlantic Ocean | South Atlantic      | 0.38 | Semi-arid | 0.10 | 0.08 | 0.02 | 0.00 |
| 106 | Flinders      | 107,786 | South-West Pacific                               | Pacific Ocean  | Gulf of Carpentaria | 0.19 | Arid      | 0.01 | 0.01 | 0.00 | 0.00 |
| 107 | Moose         | 107,727 | North America, Central America and the Caribbean | Arctic Ocean   | Hudson-Bay          | 1.07 | Humid     | 0.01 | 0.00 | 0.00 | 0.00 |
| 108 | Hayes         | 107,549 | North America, Central America and the Caribbean | Arctic Ocean   | Hudson-Bay          | 0.77 | Humid     | 0.00 | 0.00 | 0.00 | 0.00 |
| 109 | Save          | 102,591 | Africa                                           | Indian Ocean   | Mozambique Channel  | 0.36 | Semi-arid | 0.80 | 0.71 | 0.09 | 0.00 |

|     |           |         |                                                  |                |                   |      |              |       |      |       |      |
|-----|-----------|---------|--------------------------------------------------|----------------|-------------------|------|--------------|-------|------|-------|------|
| 110 | Severn    | 101,172 | North America, Central America and the Caribbean | Arctic Ocean   | Hudson-Bay        | 0.89 | Humid        | 0.00  | 0.00 | 0.00  | 0.00 |
| 111 | Victoria  | 101,080 | South-West Pacific                               | Pacific Ocean  | Timor Sea         | 0.25 | Semi-arid    | 0.00  | 0.00 | 0.00  | 0.00 |
| 112 | Bandama   | 99,254  | Africa                                           | Atlantic Ocean | Gulf of Guinea    | 0.65 | Humid        | 0.37  | 0.37 | 0.00  | 0.00 |
| 113 | Douro     | 97,241  | Europe                                           | Atlantic Ocean | Bay of Biscay     | 0.54 | Dry subhumid | 6.48  | 3.80 | 2.68  | 0.00 |
| 114 | Rhone     | 96,638  | Europe                                           | Atlantic Ocean | Mediterranean Sea | 1.03 | Humid        | 4.33  | 3.12 | 1.21  | 0.00 |
| 115 | La Grande | 96,573  | North America, Central America and the Caribbean | Arctic Ocean   | Hudson-Bay        | 1.30 | Humid        | 0.00  | 0.00 | 0.00  | 0.00 |
| 116 | Narmada   | 96,046  | Asia                                             | Indian Ocean   | Arabian Sea       | 0.51 | Dry subhumid | 16.24 | 6.18 | 10.07 | 0.00 |
| 117 | Fitzroy   | 95,695  | South-West Pacific                               | Indian Ocean   | Indian Ocean      | 0.20 | Semi-arid    | 0.00  | 0.00 | 0.00  | 0.00 |
| 118 | Tana      | 95,249  | Africa                                           | Indian Ocean   | Indian Ocean      | 0.39 | Semi-arid    | 0.56  | 0.56 | 0.01  | 0.00 |
| 119 | Churchill | 92,712  | North America, Central America and the Caribbean | Atlantic Ocean | Labrador Sea      | 1.58 | Humid        | 0.00  | 0.00 | 0.00  | 0.00 |
| 120 | Neman     | 92,523  | Europe                                           | Atlantic Ocean | Baltic Sea        | 0.84 | Humid        | 0.27  | 0.22 | 0.05  | 0.00 |

|     |                |        |                                                  |                |                        |      |              |       |       |       |      |
|-----|----------------|--------|--------------------------------------------------|----------------|------------------------|------|--------------|-------|-------|-------|------|
| 121 | Back           | 91,458 | North America, Central America and the Caribbean | Arctic Ocean   | Northwestern Passages  | 0.56 | Dry subhumid | 0.00  | 0.00  | 0.00  | 0.00 |
| 122 | Anabar         | 89,819 | Asia                                             | Arctic Ocean   | Laptev Sea             | 0.58 | Dry subhumid | 0.00  | 0.00  | 0.00  | 0.00 |
| 123 | Panuco         | 89,696 | North America, Central America and the Caribbean | Atlantic Ocean | Gulf of Mexico         | 0.46 | Semi-arid    | 5.51  | 4.07  | 1.43  | 0.00 |
| 124 | Bancannia Lake | 87,901 | South-West Pacific                               |                |                        | 0.11 | Arid         | 0.00  | 0.00  | 0.00  | 0.00 |
| 125 | Saguenay       | 87,596 | North America, Central America and the Caribbean | Atlantic Ocean | Gulf of Saint Lawrence | 1.49 | Humid        | 0.02  | 0.01  | 0.01  | 0.00 |
| 126 | Murchison      | 87,572 | South-West Pacific                               | Indian Ocean   | Indian Ocean           | 0.08 | Arid         | 0.00  | 0.00  | 0.00  | 0.00 |
| 127 | Daugava        | 85,616 | Europe                                           | Atlantic Ocean | Baltic Sea             | 0.89 | Humid        | 0.15  | 0.12  | 0.02  | 0.00 |
| 128 | Ebro           | 85,460 | Europe                                           | Atlantic Ocean | Mediterranean Sea      | 0.44 | Semi-arid    | 8.64  | 7.76  | 0.88  | 0.00 |
| 129 | Cuyuni         | 85,208 | South America                                    | Atlantic Ocean | North Atlantic         | 1.18 | Humid        | 0.08  | 0.06  | 0.02  | 0.00 |
| 130 | San Joaquin    | 84,848 | North America, Central America and the Caribbean | Pacific Ocean  | North Pacific          | 0.25 | Semi-arid    | 26.55 | 10.59 | 15.96 | 0.00 |

|     |            |        |                                                  |                |                     |      |              |       |      |       |      |
|-----|------------|--------|--------------------------------------------------|----------------|---------------------|------|--------------|-------|------|-------|------|
| 131 | Kapuas     | 83,880 | South-West Pacific                               | Pacific Ocean  | Natuna Sea          | 2.45 | Humid        | 0.52  | 0.52 | 0.01  | 0.00 |
| 132 | Comoe      | 83,111 | Africa                                           | Atlantic Ocean | Gulf of Guinea      | 0.62 | Dry subhumid | 0.25  | 0.24 | 0.01  | 0.00 |
| 133 | Doce       | 82,935 | South America                                    | Atlantic Ocean | South Atlantic      | 0.98 | Humid        | 1.54  | 1.49 | 0.06  | 0.00 |
| 134 | Kizilirmak | 80,780 | Europe                                           | Atlantic Ocean | Black Sea           | 0.33 | Semi arid    | 5.22  | 3.99 | 1.15  | 0.07 |
| 135 | Sepik      | 80,129 | South-West Pacific                               | Pacific Ocean  | Bismarck Sea        | 2.10 | Humid        | 0.00  | 0.00 | 0.00  | 0.00 |
| 136 | Mamberamo  | 79,016 | South-West Pacific                               | Pacific Ocean  | South Pacific       | 1.98 | Humid        | 0.00  | 0.00 | 0.00  | 0.00 |
| 137 | Cauvery    | 78,369 | Asia                                             | Indian Ocean   | Bay of Bengal       | 0.54 | Dry subhumid | 17.97 | 7.64 | 10.34 | 0.00 |
| 138 | Ashburton  | 77,971 | South-West Pacific                               | Indian Ocean   | Indian Ocean        | 0.09 | Arid         | 0.00  | 0.00 | 0.00  | 0.00 |
| 139 | Roper      | 77,475 | South-West Pacific                               | Pacific Ocean  | Gulf of Carpentaria | 0.35 | Semi arid    | 0.01  | 0.00 | 0.00  | 0.00 |
| 140 | Yaqui      | 77,327 | North America, Central America and the Caribbean | Pacific Ocean  | Gulf of California  | 0.27 | Semi arid    | 1.47  | 0.74 | 0.73  | 0.00 |
| 141 | Mezen      | 76,753 | Europe                                           | Arctic Ocean   | White Sea           | 0.97 | Humid        | 0.00  | 0.00 | 0.00  | 0.00 |
| 142 | Mahakam    | 76,749 | South-West Pacific                               | Pacific Ocean  | Makassar Strait     | 2.14 | Humid        | 0.05  | 0.05 | 0.00  | 0.00 |
| 143 | Sassandra  | 75,333 | Africa                                           | Atlantic Ocean | Gulf of Guinea      | 0.85 | Humid        | 0.15  | 0.15 | 0.00  | 0.00 |

|     |               |        |                                                  |                |                 |      |              |       |       |      |      |
|-----|---------------|--------|--------------------------------------------------|----------------|-----------------|------|--------------|-------|-------|------|------|
| 144 | Gascoyne      | 73,672 | South-West Pacific                               | Indian Ocean   | Indian Ocean    | 0.08 | Arid         | 0.03  | 0.01  | 0.02 | 0.00 |
| 145 | Jaguaribe     | 73,491 | South America                                    | Atlantic Ocean | South Atlantic  | 0.44 | Semi-arid    | 0.78  | 0.62  | 0.16 | 0.00 |
| 146 | Titicaca      | 73,324 | South America                                    |                |                 | 0.52 | Dry subhumid | 0.56  | 0.48  | 0.08 | 0.00 |
| 147 | Po            | 73,290 | Europe                                           | Atlantic Ocean | Adriatic Sea    | 0.93 | Humid        | 21.69 | 17.47 | 4.23 | 0.00 |
| 148 | Seine         | 73,248 | Europe                                           | Atlantic Ocean | English Channel | 0.78 | Humid        | 4.43  | 1.21  | 3.22 | 0.00 |
| 149 | Dniestr       | 73,160 | Europe                                           | Atlantic Ocean | Black Sea       | 0.72 | Humid        | 3.33  | 3.33  | 0.00 | 0.00 |
| 150 | Gambia        | 72,619 | Africa                                           | Atlantic Ocean | North Atlantic  | 0.37 | Semi-arid    | 0.04  | 0.04  | 0.00 | 0.00 |
| 151 | Jacui         | 71,806 | South America                                    | Atlantic Ocean | South Atlantic  | 1.18 | Humid        | 2.83  | 2.76  | 0.08 | 0.00 |
| 152 | Sacramento    | 71,344 | North America, Central America and the Caribbean | Pacific Ocean  | North Pacific   | 0.50 | Dry subhumid | 12.52 | 5.75  | 6.78 | 0.00 |
| 153 | Tagus         | 71,140 | Europe                                           | Atlantic Ocean | North Atlantic  | 0.38 | Semi-arid    | 4.98  | 2.57  | 2.40 | 0.00 |
| 154 | Jequitinhonha | 70,981 | South America                                    | Atlantic Ocean | South Atlantic  | 0.70 | Humid        | 0.97  | 0.96  | 0.01 | 0.00 |
| 155 | Susquehanna   | 70,979 | North America, Central America and the Caribbean | Atlantic Ocean | North Atlantic  | 0.96 | Humid        | 0.27  | 0.20  | 0.07 | 0.00 |
| 156 | Essequibo     | 69,650 | South America                                    | Atlantic Ocean | North Atlantic  | 1.20 | Humid        | 0.00  | 0.00  | 0.00 | 0.00 |
| 157 | Guadiana      | 66,927 | Europe                                           | Atlantic Ocean | North Atlantic  | 0.31 | Semi-arid    | 7.37  | 3.51  | 3.86 | 0.00 |

|     |              |        |                                                  |                |                     |      |              |       |      |      |      |
|-----|--------------|--------|--------------------------------------------------|----------------|---------------------|------|--------------|-------|------|------|------|
| 158 | Anderson     | 66,586 | North America, Central America and the Caribbean | Arctic Ocean   | Beaufort Sea        | 0.42 | Semi-arid    | 0.00  | 0.00 | 0.00 | 0.00 |
| 159 | Maroni       | 66,408 | South America                                    | Atlantic Ocean | North Atlantic      | 1.47 | Humid        | 0.00  | 0.00 | 0.00 | 0.00 |
| 160 | Nottaway     | 66,053 | North America, Central America and the Caribbean | Arctic Ocean   | Hudson-Bay          | 1.27 | Humid        | 0.00  | 0.00 | 0.00 | 0.00 |
| 161 | Copper       | 65,704 | North America, Central America and the Caribbean | Pacific Ocean  | Gulf of Alaska      | 1.40 | Humid        | 0.00  | 0.00 | 0.00 | 0.00 |
| 162 | Winisk       | 65,635 | North America, Central America and the Caribbean | Arctic Ocean   | Hudson-Bay          | 0.95 | Humid        | 0.00  | 0.00 | 0.00 | 0.00 |
| 163 | Tapi         | 64,337 | Asia                                             | Indian Ocean   | Arabian Sea         | 0.37 | Semi-arid    | 10.07 | 2.47 | 7.60 | 0.00 |
| 164 | Sungai Fly   | 64,320 | South-West Pacific                               | Pacific Ocean  | Coral Sea           | 2.39 | Humid        | 0.00  | 0.00 | 0.00 | 0.00 |
| 165 | Alazeya      | 64,313 | Asia                                             | Arctic Ocean   | East Siberian Sea   | 0.49 | Semi-arid    | 0.00  | 0.00 | 0.00 | 0.00 |
| 166 | Courantyne   | 64,286 | South America                                    | Atlantic Ocean | North Atlantic      | 1.21 | Humid        | 0.00  | 0.00 | 0.00 | 0.00 |
| 167 | Mitchell     | 63,661 | South-West Pacific                               | Pacific Ocean  | Gulf of Carpentaria | 0.47 | Semi-arid    | 0.29  | 0.25 | 0.04 | 0.01 |
| 168 | Pivdenny Buh | 63,568 | Europe                                           | Atlantic Ocean | Black Sea           | 0.57 | Dry subhumid | 1.88  | 1.88 | 0.00 | 0.00 |



Table S3. Datasets used in our study. Various datasets with different spatial resolutions are processed as area-averaged values over 168 river basins worldwide and global land for spatial consistency. For convenience in calculations, all the constituent water balance variables for calculating ET-WB are necessarily extended to the study period 2003-2021, with the missing months (temporally not covered) replaced with NaN values. However, only the overlapping period between ET-WB and four auxiliary ET products are extracted for comparisons, i.e., 2002-2014 for MODIS, 2002-2015 for FLUXCOM, 2002-2021 for GLEAM, and 2002-2016 for WGHM, respectively.

| Variable      | Dataset                                             | Type             | Reference                  | Selected period | Temporal resolution | Spatial resolution (longitude×latitude) | Spatial coverage                               |
|---------------|-----------------------------------------------------|------------------|----------------------------|-----------------|---------------------|-----------------------------------------|------------------------------------------------|
| Runoff        | G-RUN Ensemble                                      | In-situ based    | Ghiggi et al., 2021        | 2002.5-2019.12  | Monthly             | 0.5°×0.5°                               | Global land excluding Antarctica               |
|               | LORA-v1.0                                           | Combined product | Hobeichi et al., 2019      | 2002.5-2012.12  | Monthly             | 0.5°×0.5°                               | Global land excluding Greenland and Antarctica |
|               | WGHM                                                | GHM              | Schmied et al., 2021       | 2002.5-2016.12  | Monthly             | 0.5°×0.5°                               | Global land excluding Antarctica               |
|               | Global River Flow and Continental Discharge Dataset | In situ          | Dai and Trenberth, 2002    | 2002.5-2018.12  | Monthly             | Gauge stations                          | Global major river basins                      |
|               | GloFAS-v2.1                                         | Reanalysis       | Harrigan et al., 2020      | 2002.5-2021.12  | Daily               | 0.1°×0.1°                               | Global land excluding Antarctica               |
|               | GloFAS-v3.0                                         | Reanalysis       | Alfieri et al., 2020       | 2002.5-2018.12  | Daily               | 0.1°×0.1°                               | Global land excluding Antarctica               |
|               | GloFAS-v3.1                                         | Reanalysis       | Harrigan et al., 2020      | 2002.5-2021.12  | Daily               | 0.1°×0.1°                               | Global land excluding Antarctica               |
| Precipitation | ERA5-land                                           | Reanalysis       | Muñoz-Sabater et al., 2021 | 2002.5-2021.12  | Monthly             | 0.1°×0.1°                               | Global land                                    |
|               | ERA5                                                | Reanalysis       | Hersbach et al., 2020      | 2002.5-2021.12  | Monthly             | 0.25°×0.25°                             | Global land and ocean                          |
|               | NOAA CIRES 20th Century-v3                          | Reanalysis       | Slivinski et al., 2019     | 2002.5-2015.12  | Monthly             | 0.702°×0.702°                           | Global land and ocean                          |
|               | JRA55                                               | Reanalysis       | Kobayashi et al., 2015     | 2002.5-2021.12  | Monthly             | 55 km×55 km                             | Global land and ocean                          |
|               | MERRA2                                              | Reanalysis       | Gelaro et al., 2017        | 2002.5-2021.12  | Monthly             | 0.625°×0.5°                             | Global land excluding Greenland and Antarctica |

|                        |                  |                        |                |         |                |                                  |
|------------------------|------------------|------------------------|----------------|---------|----------------|----------------------------------|
| NCEP NCAR-Reanalysis 1 | Reanalysis       | Kistler et al., 2001   | 2002.5-2021.12 | Monthly | 1.875°×1.9048° | Global land and ocean            |
| NCEP DOE-Reanalysis 2  | Reanalysis       | Kanamitsu et al., 2002 | 2002.5-2021.12 | Monthly | 1.875°×1.9048° | Global land and ocean            |
| CFSR-v1&2              | Reanalysis       | Saha et al., 2010      | 2002.5-2021.12 | Monthly | 0.5°×0.5°      | Global land and ocean            |
| WFDEI                  | Reanalysis       | Weedon et al., 2014    | 2002.5-2016.12 | Monthly | 0.5°×0.5°      | Global land excluding Antarctica |
| PERSIANN CDR-v1        | Satellite        | Ashouri et al., 2015   | 2002.5-2021.12 | Daily   | 0.25°×0.25°    | 60° S–60°N                       |
| TRMM 3B43-v7           | Satellite        | Huffman et al., 2007   | 2002.5-2019.12 | Monthly | 0.25°×0.25°    | 50° S–50°N                       |
| GSMaP                  | Satellite        | Okamoto et al., 2005   | 2002.5-2021.12 | Monthly | 0.1°×0.1°      | 60° S–60°N                       |
| CHIRPS-v2.0            | Satellite        | Funk et al., 2015      | 2002.5-2021.12 | Daily   | 0.25°×0.25°    | Global land between 50° S–50°N   |
| GPM IMERG-v06          | Satellite        | Huffman et al., 2019   | 2002.5-2021.9  | Monthly | 0.1°×0.1°      | 60° S–60°N                       |
| GPCP-v3.2              | Satellite        | Huffman et al., 2022   | 2002.5-2020.12 | Monthly | 0.5°×0.5°      | Global land and ocean            |
| CRU TS-v4.06           | In situ-based    | Harris et al., 2020    | 2002.5-2021.12 | Monthly | 0.5°×0.5°      | Global land excluding Antarctica |
| GPCC-v2020             | In situ-based    | Schneider et al., 2020 | 2002.5-2019.12 | Monthly | 0.25°×0.25°    | Global land excluding Antarctica |
| CPC Unified            | In situ-based    | Chen and Xie, 2008     | 2002.5-2021.12 | Daily   | 0.5°×0.5°      | Global land                      |
| MSWEP-v2.8             | Combined product | Beck et al., 2019      | 2002.5-2021.12 | Monthly | 0.1°×0.1°      | Global land and ocean            |
| PGF-v3                 | Combined product | Sheffield et al., 2006 | 2002.5-2016.12 | Monthly | 0.25°×0.25°    | 60° S–90°N                       |
| GLDAS-v1               | Combined product | Rodell et al., 2004    | 2002.5-2019.6  | Monthly | 1°×1°          | Global land excluding Antarctica |
| GLDAS-v2.0             | Combined product | Rodell et al., 2004    | 2002.5-2014.12 | Monthly | 1°×1°          | Global land excluding Antarctica |
| GLDAS-v2.1             | Combined product | Rodell et al., 2004    | 2002.5-2021.12 | Monthly | 1°×1°          | Global land excluding Antarctica |

|                                            |                                    |               |                              |                    |         |             |                                        |
|--------------------------------------------|------------------------------------|---------------|------------------------------|--------------------|---------|-------------|----------------------------------------|
| Actual<br>evaporation                      | MODIS16                            | Satellite     | Mu et al.,<br>2011           | 2002.5-<br>2014.12 | Monthly | 0.5°×0.5°   | 60° S–80°N                             |
|                                            | FLUXCOM                            | In situ-based | Jung et al.,<br>2019         | 2002.5-<br>2015.12 | Monthly | 0.5°×0.5°   | Global land<br>excluding<br>Antarctica |
|                                            | GLEAM-v3.6a                        | Satellite     | Martens et<br>al., 2017      | 2002.5-<br>2021.12 | Monthly | 0.25°×0.25° | Global land                            |
|                                            | WGHM                               | GHM           | Schmied<br>et al.,<br>2021   | 2002.5-<br>2016.12 | Monthly | 0.5°×0.5°   | Global land<br>excluding<br>Antarctica |
| Terrestrial<br>water<br>storage<br>anomaly | GRACE CSR<br>RL06 mascons-<br>v02  | Satellite     | Save et<br>al., 2016         | 2002.4-<br>2021.12 | Monthly | 0.25°×0.25° | Global land and<br>ocean               |
|                                            | GRACE JPL<br>RL06 mascons-<br>v02  | Satellite     | Wiese et<br>al., 2018        | 2002.4-<br>2021.12 | Monthly | 0.5°×0.5°   | Global land and<br>ocean               |
|                                            | GRACE GSFC<br>RL06 mascons-<br>v02 | Satellite     | Loomis et<br>al., 2019       | 2002.4-<br>2021.12 | Monthly | 0.5°×0.5°   | Global land and<br>ocean               |
|                                            | GRACE CSR<br>RL06 Level-2 SH       | Satellite     | Swenson<br>and Wahr,<br>2006 | 2002.4-<br>2021.12 | Monthly | 1°×1°       | Global land and<br>ocean               |
|                                            | GRACE JPL<br>RL06 Level-2 SH       | Satellite     | Swenson<br>and Wahr,<br>2006 | 2002.4-<br>2021.12 | Monthly | 1°×1°       | Global land and<br>ocean               |
|                                            | GRACE GFZ<br>RL06 Level-2 SH       | Satellite     | Swenson<br>and Wahr,<br>2006 | 2002.4-<br>2021.12 | Monthly | 1°×1°       | Global land and<br>ocean               |
|                                            | WGHM                               | GHM           | Schmied<br>et al.,<br>2021   | 2002.4-<br>2016.12 | Monthly | 0.5°×0.5°   | Global land<br>excluding<br>Antarctica |

Table S4. Basic information of 53 selected GRDC stations for comparison with R datasets. The column ‘controlled percentage’ defines the ratio between the drainage area of the station and the basin area of the corresponding basins. Columns ‘Start’ and ‘End’ means the start and end times of the observation records of the station in GRDC. Column ‘missing rate’ is the percentage of the missing months to the whole period May 2002-December 2021 (237 months).

| GR<br>DC<br>ID | River           | Gauge station            | Latitude(°) | Longitude(°) | Controlled<br>area(km <sup>2</sup> ) | Basin<br>area(km <sup>2</sup> ) | Basin<br>ID | Controlled<br>percentage(%) | Start<br>(Year/month) | End<br>(Year/month) | Missing<br>rate (%) |
|----------------|-----------------|--------------------------|-------------|--------------|--------------------------------------|---------------------------------|-------------|-----------------------------|-----------------------|---------------------|---------------------|
| 1147<br>010    | Congo<br>river  | Kinshasa                 | -4.30       | 15.30        | 3,475,000                            | 3,705,226                       | 2           | 94                          | 2002/5                | 2010/12             | 59                  |
| 1159<br>100    | Orange<br>river | Vioolsdrif<br>(27811003) | -<br>28.76  | 17.72        | 866,486                              | 977,322                         | 23          | 89                          | 2002/5                | 2020/10             | 14                  |
| 1255<br>100    | Kunene<br>river | Ruacana<br>(64740001)    | -<br>17.40  | 14.20        | 89,600                               | 108,947                         | 105         | 82                          | 2002/5                | 2021/6              | 10                  |
| 2178<br>950    | Huai he         | Bengbu                   | 32.93       | 117.38       | 121,330                              | 172,079                         | 75          | 71                          | 2004/5                | 2004/9              | 98                  |

|         |                      |                                    |        |         |           |           |     |     |        |         |    |
|---------|----------------------|------------------------------------|--------|---------|-----------|-----------|-----|-----|--------|---------|----|
| 2180800 | Yellow river         | Huayankou                          | 34.92  | 113.65  | 730,036   | 962,986   | 24  | 76  | 2004/1 | 2004/12 | 95 |
| 2181900 | Yangtze river        | Datong                             | 30.77  | 117.62  | 1,705,383 | 1,748,118 | 13  | 98  | 2004/1 | 2004/12 | 95 |
| 2186800 | Xi jiang             | Wuzhou 3                           | 23.48  | 111.30  | 329,705   | 411,930   | 48  | 80  | 2004/1 | 2004/12 | 95 |
| 2906900 | Amur river           | Komsomolsk                         | 50.63  | 137.12  | 1,730,000 | 2,238,970 | 10  | 77  | 2002/5 | 2006/12 | 78 |
| 2909150 | Yenisey              | Igarka                             | 67.48  | 86.50   | 2,440,000 | 2,505,671 | 7   | 97  | 2002/5 | 2015/12 | 36 |
| 2912600 | Ob'                  | Salekhard                          | 66.57  | 66.53   | 2,949,998 | 3,040,606 | 5   | 97  | 2002/5 | 2015/12 | 36 |
| 2998510 | Kolyma               | Kolymskaya                         | 68.73  | 158.72  | 526,000   | 652,958   | 37  | 81  | 2002/5 | 2008/12 | 69 |
| 2999110 | Yana                 | Ubileynaya                         | 70.75  | 136.08  | 224,000   | 233,391   | 63  | 96  | 2002/5 | 2007/12 | 73 |
| 2999150 | Anabar               | Saskylakh                          | 71.98  | 114.06  | 78,800    | 89,819    | 122 | 88  | 2002/5 | 2015/12 | 47 |
| 2999910 | Olenek               | 7.5km d/s of mouth of river pur    | 72.12  | 123.22  | 198,000   | 217,723   | 66  | 91  | 2002/5 | 2015/12 | 38 |
| 3265601 | Parana, rio          | Timbues                            | -32.67 | -60.71  | 2,346,000 | 2,647,020 | 6   | 89  | 2002/5 | 2014/8  | 43 |
| 3649900 | Tocantins, rio       | Itupiranga                         | -5.13  | -49.32  | 731,270   | 772,468   | 32  | 95  | 2002/5 | 2010/7  | 64 |
| 3650481 | Parnaiba, rio        | Luzilandia                         | -3.45  | -42.37  | 322,823   | 332,979   | 51  | 97  | 2002/5 | 2019/8  | 19 |
| 3652450 | Jequitinhonha, rio   | Jacinto                            | -16.14 | -40.31  | 63,300    | 70,981    | 154 | 89  | 2002/5 | 2010/7  | 61 |
| 4103200 | Yukon river          | Pilot station, ak                  | 61.93  | -162.88 | 831,390   | 832,821   | 28  | 100 | 2002/5 | 2020/10 | 14 |
| 4115200 | Columbia river       | The dalles, or                     | 45.61  | -121.17 | 613,830   | 669,400   | 35  | 92  | 2002/5 | 2019/1  | 21 |
| 4127800 | Mississippi river    | Vicksburg, ms                      | 32.32  | -90.91  | 2,964,255 | 3,240,619 | 4   | 91  | 2002/5 | 2020/12 | 18 |
| 4143550 | Saint lawrence river | Cornwall(ont.), near massena, n.y. | 45.01  | -74.79  | 773,892   | 1,053,301 | 21  | 73  | 2002/5 | 2020/12 | 13 |
| 4146281 | Sacramento river     | Verona, ca                         | 38.77  | -121.60 | 55,040    | 71,344    | 152 | 77  | 2002/5 | 2021/3  | 11 |
| 4147700 | Susquehanna river    | Harrisburg, pa.                    | 40.25  | -76.89  | 62,419    | 70,979    | 155 | 88  | 2002/5 | 2021/7  | 10 |
| 4150500 | Brazos river         | Richmond, tex.                     | 29.58  | -95.76  | 116,827   | 118,643   | 99  | 98  | 2002/5 | 2021/7  | 10 |
| 4207900 | Fraser river         | Hope                               | 49.38  | -121.45 | 217,000   | 230,828   | 64  | 94  | 2002/5 | 2019/12 | 17 |
| 4208025 | Mackenzie river      | Arctic red river                   | 67.46  | -133.74 | 1,660,000 | 1,795,636 | 12  | 92  | 2002/5 | 2018/4  | 25 |

|         |                 |                                |        |         |           |           |     |     |         |         |    |
|---------|-----------------|--------------------------------|--------|---------|-----------|-----------|-----|-----|---------|---------|----|
| 4209805 | Back river      | Above hermann river            | 66.09  | -96.51  | 93,900    | 91,458    | 121 | 103 | 2002/5  | 2018/12 | 33 |
| 4213720 | Nelson river    | At kelsey generating station   | 56.04  | -96.53  | 1,010,000 | 1,106,520 | 19  | 91  | 2002/5  | 2020/12 | 13 |
| 4214025 | Hayes river     | Below gods river               | 56.43  | -92.79  | 103,000   | 107,549   | 108 | 96  | 2002/5  | 2020/12 | 30 |
| 4214260 | Churchill river | Above granville falls          | 56.15  | -100.46 | 228,000   | 302,494   | 55  | 75  | 2002/5  | 2019/12 | 18 |
| 4214450 | Winisk river    | Below asheweig river tributary | 54.52  | -87.23  | 50,000    | 65,635    | 162 | 76  | 2002/5  | 2020/12 | 14 |
| 4214520 | Albany river    | Near hat island                | 51.33  | -83.84  | 118,000   | 134,726   | 91  | 88  | 2002/5  | 2019/12 | 17 |
| 4244500 | Churchill river | Above upper muskrat falls      | 53.25  | -60.79  | 92,500    | 92,712    | 119 | 100 | 2002/5  | 2016/11 | 32 |
| 5101200 | Burdekin river  | Clare                          | -19.77 | 147.24  | 129,900   | 130,431   | 94  | 100 | 2002/5  | 2012/2  | 54 |
| 5101301 | Fitzroy river   | The gap                        | -23.09 | 150.11  | 135,757   | 140,912   | 84  | 96  | 2002/5  | 2012/2  | 54 |
| 5109200 | Mitchell river  | Koolatah                       | -15.95 | 142.38  | 45,872    | 63,661    | 167 | 72  | 2002/5  | 2012/2  | 58 |
| 5606080 | Murchison river | Emu springs                    | -27.85 | 114.55  | 86,777    | 87,572    | 126 | 99  | 2002/5  | 2006/8  | 80 |
| 5607400 | Ashburton river | Nanutarra                      | -22.54 | 115.50  | 71,387    | 77,971    | 138 | 92  | 2002/5  | 2006/5  | 81 |
| 6226800 | Ebro, rio       | Tortosa                        | 40.81  | 0.52    | 84,230    | 85,460    | 128 | 99  | 2002/5  | 2017/9  | 28 |
| 6335020 | Rhine river     | Rees                           | 51.76  | 6.40    | 159,300   | 163,122   | 78  | 98  | 2002/5  | 2019/12 | 17 |
| 6340110 | Elbe river      | Neu darchau                    | 53.23  | 10.89   | 131,950   | 138,382   | 85  | 95  | 2002/5  | 2019/12 | 17 |
| 6373300 | Daugava         | Daugavpils                     | 55.86  | 26.51   | 64,500    | 85,616    | 127 | 75  | 2002/5  | 2020/12 | 18 |
| 6457010 | Oder river      | Gozdowice                      | 52.76  | 14.32   | 109,811   | 118,791   | 98  | 92  | 2002/5  | 2020/10 | 13 |
| 6458010 | Vistula         | Tzew                           | 54.09  | 18.81   | 193,923   | 192,638   | 70  | 101 | 2019/11 | 2020/10 | 95 |
| 6574150 | Nemunas         | Smalininkai                    | 55.08  | 22.58   | 81,200    | 92,523    | 120 | 88  | 2002/5  | 2009/12 | 69 |
| 6590700 | Kura river      | Surra                          | 40.07  | 48.53   | 178,000   | 189,819   | 71  | 94  | 2002/5  | 2017/12 | 27 |
| 6955430 | Neva            | Novosaratovka                  | 59.84  | 30.53   | 281,000   | 281,465   | 57  | 100 | 2002/5  | 2011/12 | 55 |
| 6970250 | Severnaya dvina | Ust'-pinega                    | 64.15  | 41.92   | 348,000   | 306,849   | 54  | 113 | 2002/5  | 2014/9  | 49 |
| 6970500 | Mezen'          | Malonisogorskaya               | 65.03  | 45.62   | 56,400    | 76,753    | 141 | 73  | 2002/5  | 2014/12 | 41 |
| 6970700 | Pechora         | Oksino                         | 67.60  | 52.20   | 312,000   | 314,221   | 52  | 99  | 2002/5  | 2014/12 | 41 |
| 6977100 | Volga           | Volgograd power plant          | 48.80  | 44.59   | 1,360,000 | 1,424,438 | 15  | 95  | 2002/5  | 2010/12 | 59 |

|             |     |             |       |       |         |         |    |    |        |         |    |
|-------------|-----|-------------|-------|-------|---------|---------|----|----|--------|---------|----|
| 6978<br>250 | Don | Razdorskaya | 47.54 | 40.65 | 378,000 | 437,676 | 42 | 86 | 2002/5 | 2010/12 | 59 |
|-------------|-----|-------------|-------|-------|---------|---------|----|----|--------|---------|----|

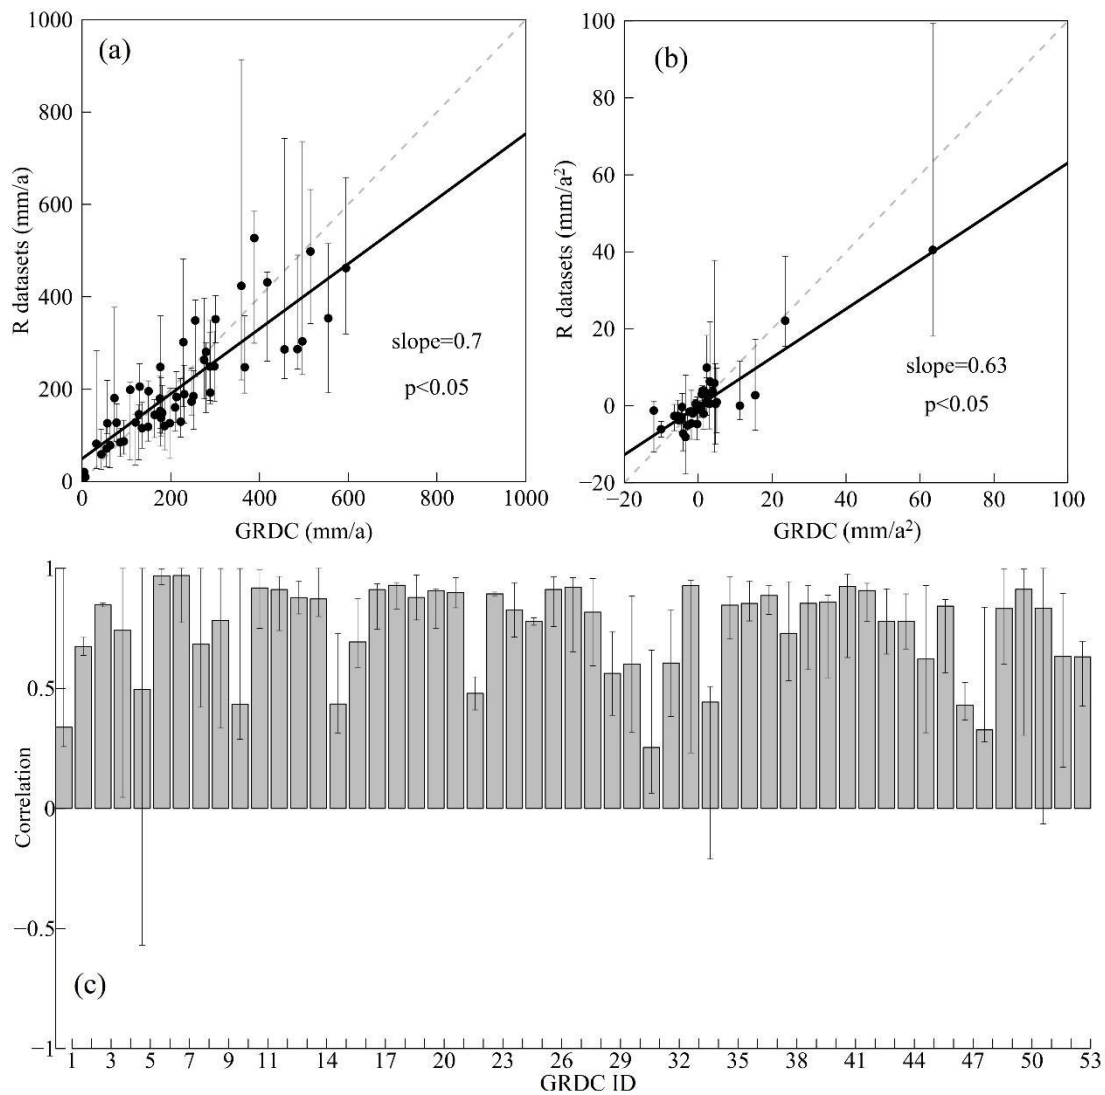

Figure. S1. Comparisons between R datasets of this study against GRDC streamflow observations over 53 river basins. Scatter plots of (a) long-term annual mean and (b) annual trends of basin-scale runoff during the period when GRDC data are available. (c) Correlation coefficients between GRDC and R datasets in each basin on the monthly scale. The error bar represents the change range of results from different R datasets. Only the GRDC stations with more than 5-year observations are used for trend calculation. Detailed information on GRDC stations is listed in Table S3.

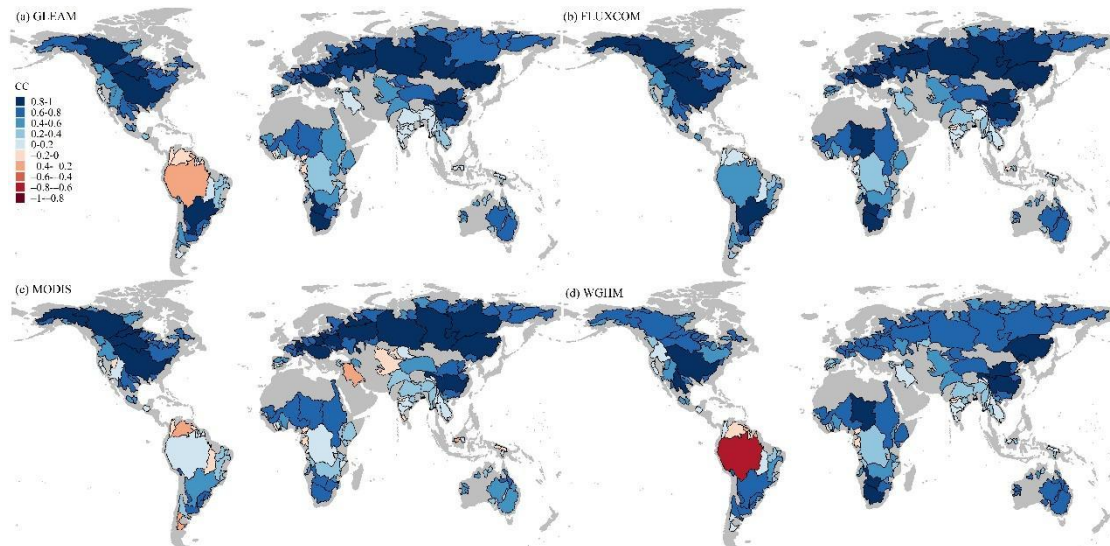

Figure S2. Spatial distribution of CC between the ET-WB and multiple auxiliary ET products on a monthly scale during the period 2002-2021.

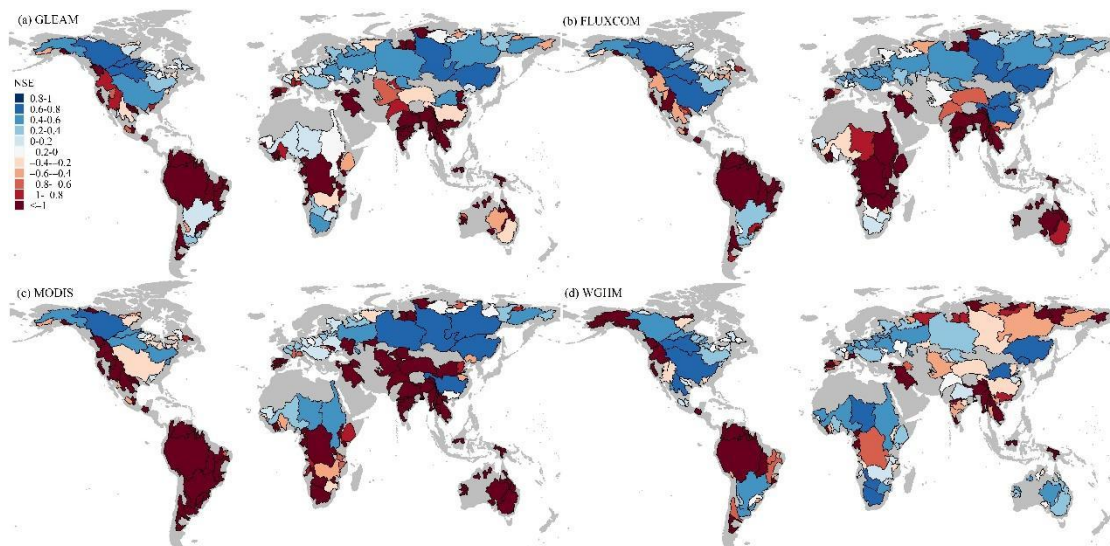

Figure S3. Spatial distribution of NSE between the ET-WB and multiple auxiliary ET products on the monthly scale during the period 2002-2021.

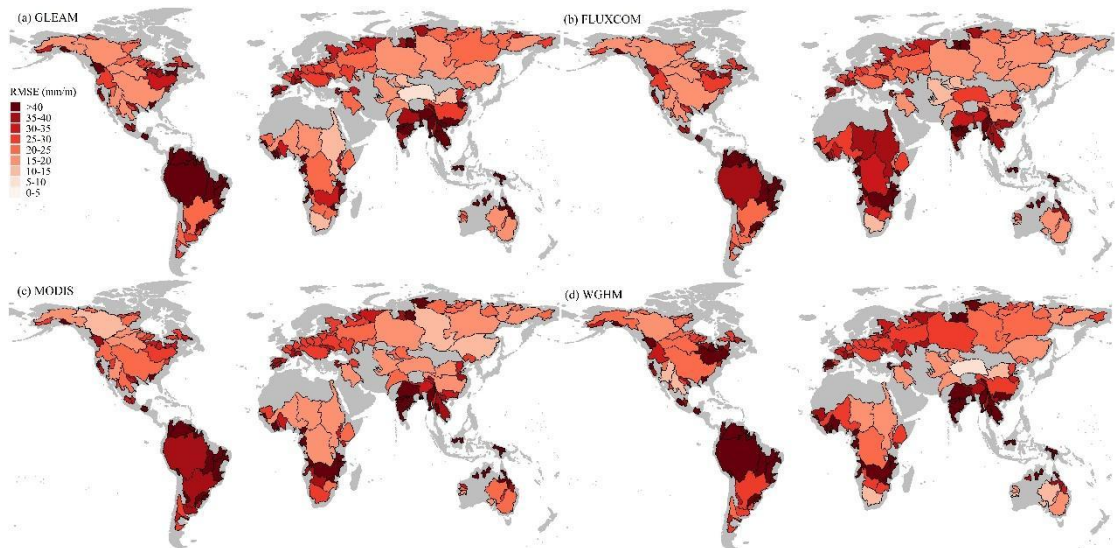

Figure S4. Spatial distribution of RMSE between the ET-WB and multiple auxiliary ET products on the monthly scale during the period 2002-2021.

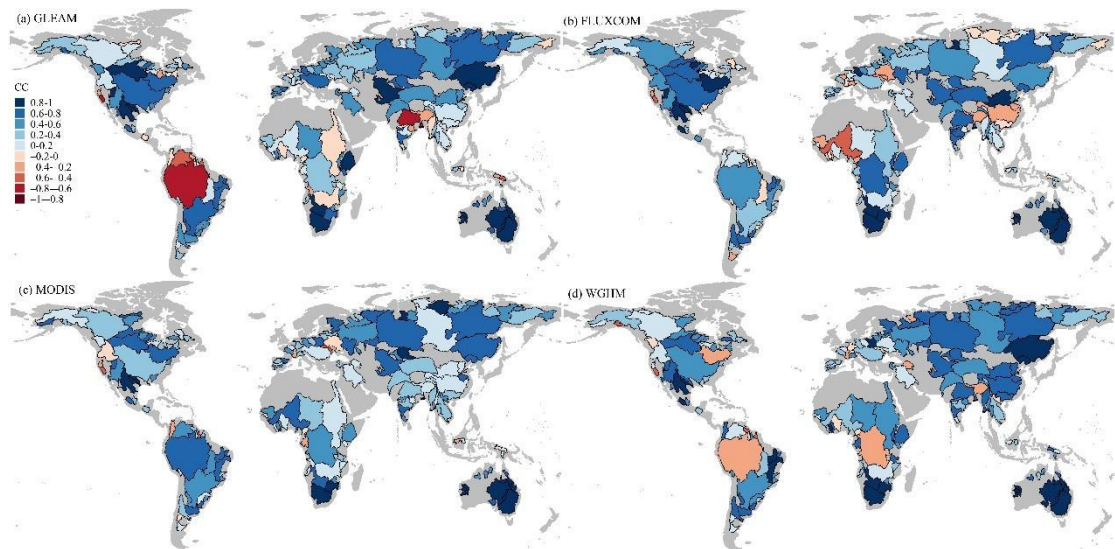

Figure S5. Spatial distribution of CC between the ET-WB and multiple auxiliary ET products on the annual scale during the period 2002-2021.



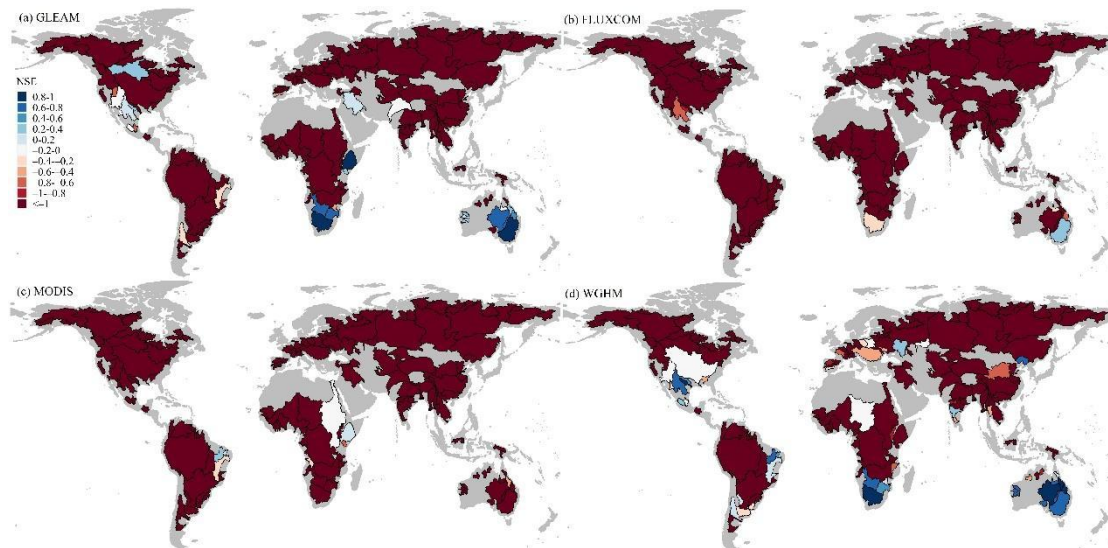

Figure S6. Spatial distribution of NSE between the ET-WB and multiple auxiliary ET products on the annual scale during the period 2002-2021.

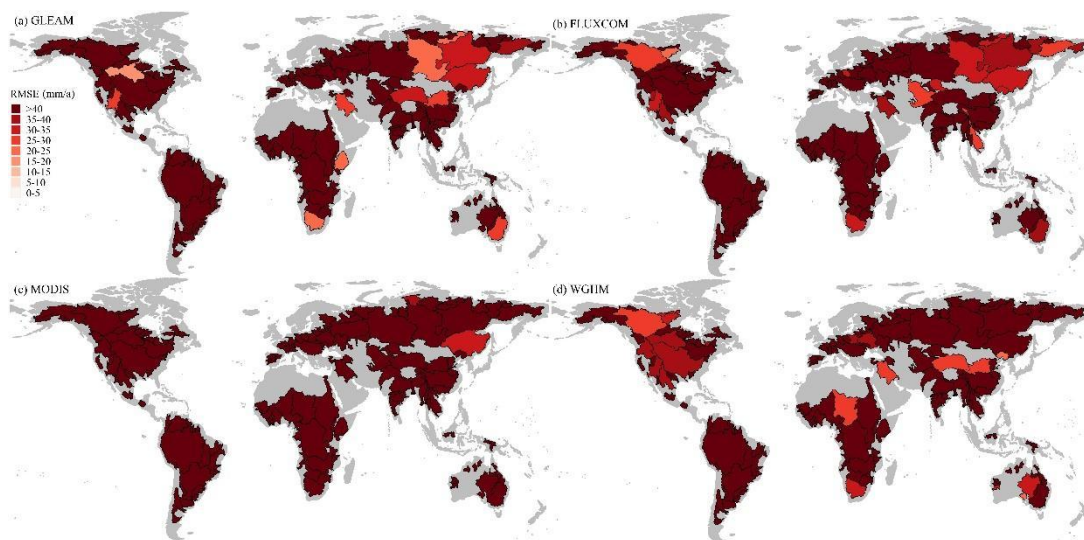

Figure S7. Spatial distribution of RMSE between the ET-WB and multiple auxiliary ET products on the annual scale during the period 2002-2021.

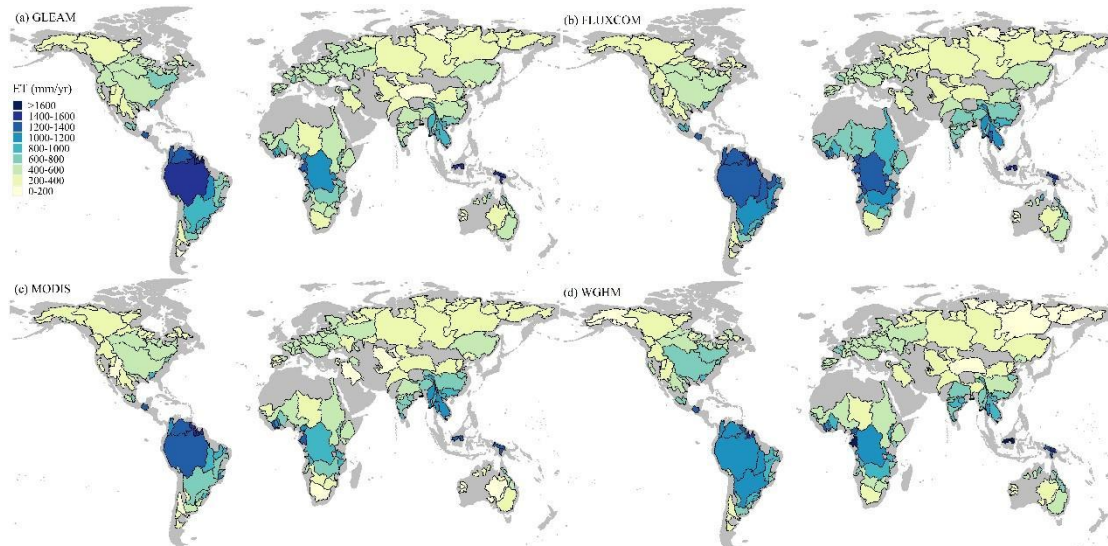

Figure S8. Global distribution of the long-term mean from multiple auxiliary ET products during 2003-2021. The long-term mean is calculated as the sum of the long-term averages of ET in each month.

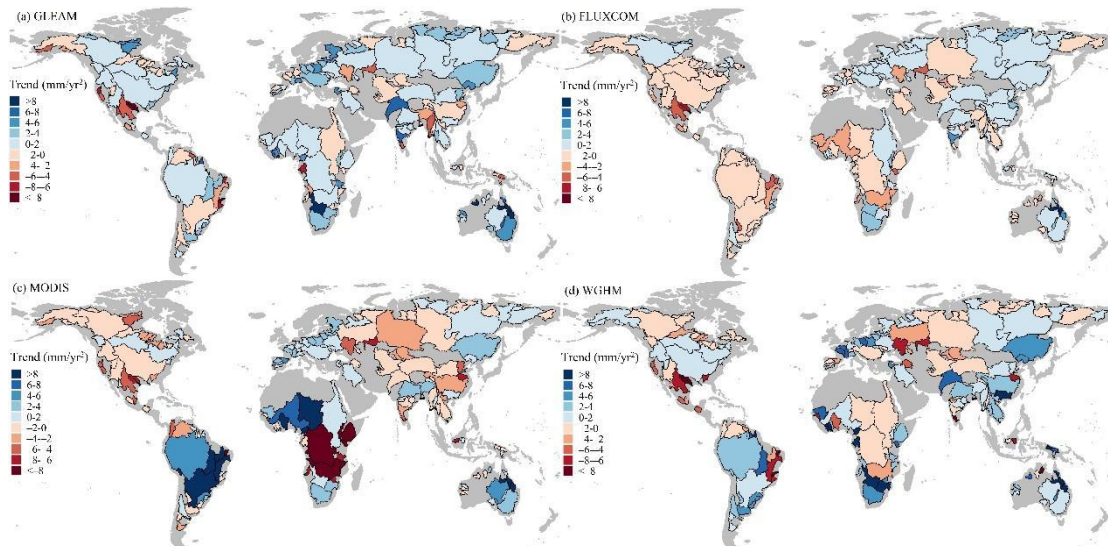

Figure S9. Global distribution of the annual trend during 2003-2014 in multiple auxiliary ET products. The trend is calculated by using the Sen's slope method.

Reference:

Shumilova, O., Tockner, K., Thieme, M., Koska, A. and Zarfl, C.: Global Water Transfer Megaprojects: A Potential Solution for the Water-Food-Energy Nexus?, *Front. Environ. Sci.*, 6, 2018.
